# Supplementary material for: Characterisation of the OTU domain deubiquitinase complement of Toxoplasma gondii
Source: Life Sci Alliance. 2023 Mar 23;6(6):e202201710. doi: 10.26508/lsa.202201710 (PMC10038098; doi:10.26508/lsa.202201710)
Supplement: Supplementary file 3 [file LSA-2022-01710_TableS2.xlsx]

## Sheet: Table S2
Table S2. Comparison of predicted OTU domain-encoding genes
Gene ID	Source	Previous name (Dhara et al. 2016)	Final list	Updated name
TGME49_207650	ToxoDB, Dhara et al. 2016	TgOTUD1A	Yes	TgOTUD1A
TGME49_237894	ToxoDB, Ponts et al. 2008, Dhara et al. 2016	TgOTUD1B	Yes	TgOTUD1B
TGME49_210678	ToxoDB	N/A	Yes	TgOTUD1D
TGME49_237900	ToxoDB	N/A	Yes	TgOTUD1E
TGME49_277990	ToxoDB, Dhara et al. 2016	TgOTUD2	Yes	TgOTUD2
TGME49_258780	ToxoDB, Ponts et al. 2008, Dhara et al. 2016	TgOTUD3A	Yes	TgOTUD3A
TGME49_229710	ToxoDB, Ponts et al. 2008, Dhara et al. 2016	TgOTUD3B	Yes	TgOTUD3B
TGME49_243430	ToxoDB, Ponts et al. 2008, Dhara et al. 2016	TgOTUD3C	Yes	TgOTUD3C
TGME49_271070	Ponts et al. 2008, Dhara et al. 2016	TgOTU7	Yes	TgOTUD6A*
TGME49_243510	ToxoDB, Ponts et al. 2008, Dhara et al. 2016	TgOTUD5	Yes	TgOTUD6B*
TGME49_260510	ToxoDB, Ponts et al. 2008, Dhara et al. 2016	TgOTUB1	Yes	TgOTUB1
TGME49_216440	ToxoDB, Ponts et al. 2008, Dhara et al. 2016	TgOTU8	Yes	TgOTU8
TGME49_266500	Dhara et al. 2016	TgOTU9	Yes	TgOTU9
TGME49_268690	Ponts et al. 2008	N/A	Yes	TgOTU10
TGME49_323200	ToxoDB, Ponts et al. 2008, Dhara et al. 2016	TgOTUD1C	No^	N/A
TGME49_323600	ToxoDB	N/A	No^	N/A
TGME49_323700	ToxoDB	N/A	No^	N/A
TGME49_323800	ToxoDB	N/A	No^	N/A
^ Genes excluded on the basis of no genomic localisation, duplication of sequences
* Re-named OTU family members respective to Dhara et al. 2016
