# Supplementary material for: Characterisation of the OTU domain deubiquitinase complement of Toxoplasma gondii
Source: Life Sci Alliance. 2023 Mar 23;6(6):e202201710. doi: 10.26508/lsa.202201710 (PMC10038098; doi:10.26508/lsa.202201710)
Supplement: Supplementary file 5 [file LSA-2022-01710_TableS4.xlsx]

## Sheet: Table S4
Table S4. Primers for protospacer replacement
Primer	Direction	Target	Sequence
1	Reverse	All	aacttgacatccccatttac
2	Forward	TgOTUD3B	gaaagatggagccgagtagagttttagagctagaaatagcaag
3	Forward	TgOTUD6B	gcacacgcacaccagcggcgagttttagagctagaaatagcaag
